# Supplementary material
Source: PubMed Central journal article supplement (PMC8327943)
Supplement: EMBJ-40-e107826-s002.pdf [file EMBJ-40-e107826-s002.pdf]

Appendix Table of contents

Appendix Figure S1

Appendix Figure S2

Appendix Table S1-S7

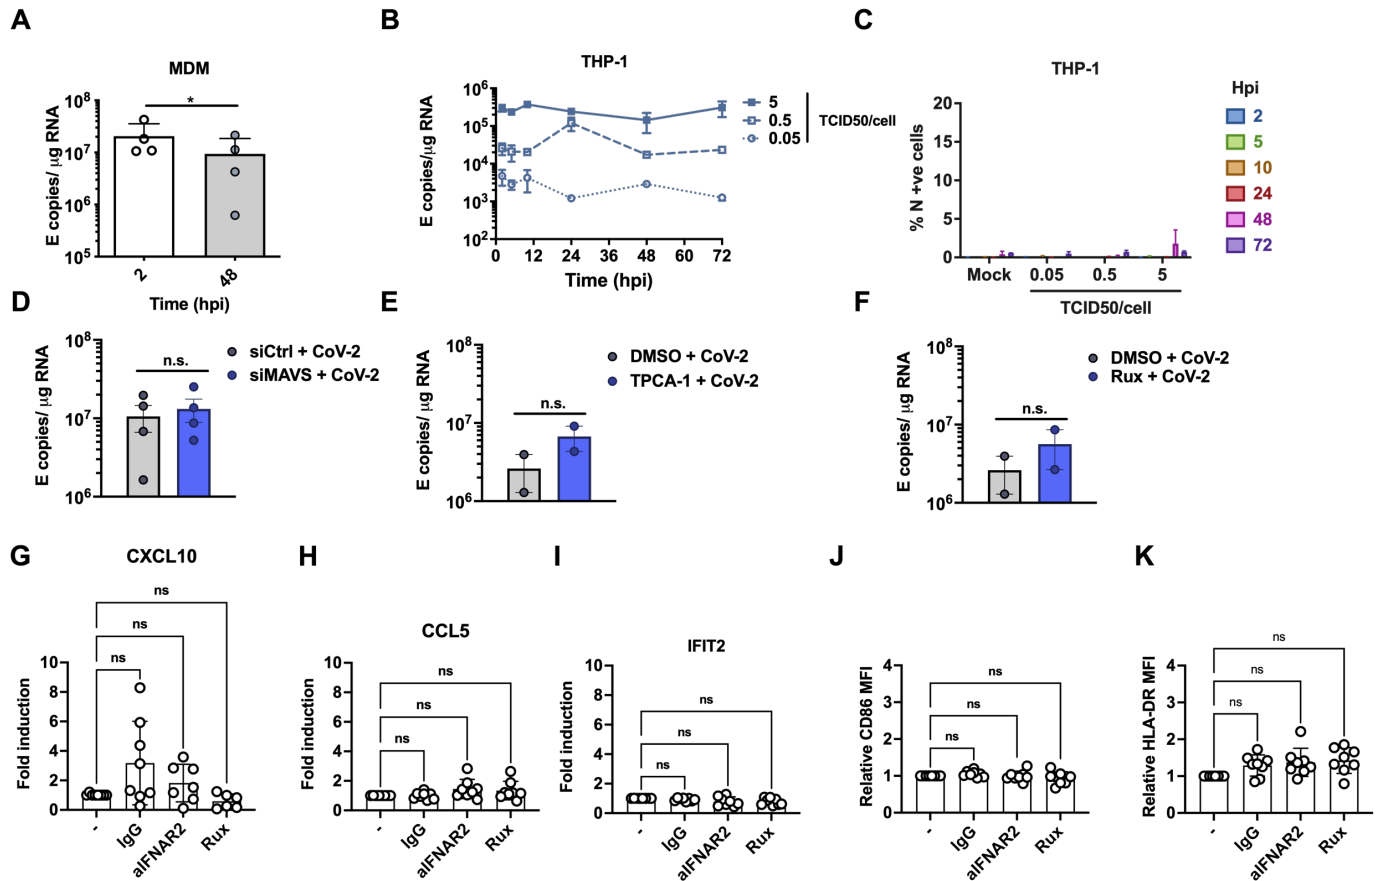

**Appendix Figure S1.** (A) MDM were exposed to SARS-CoV-2 for 2 or 48h and viral genomic and subgenomic E RNA measured (RT-qPCR), means shown +/- SEM, n=4. Statistical comparison between 2 and 48h by paired two-tailed t test, \*, p<0.05. (B, C) PMA-differentiated THP-1 macrophages were exposed to SARS-CoV-2 for 72h measuring (B) viral genomic and subgenomic E RNA (qRT-PCR) or (C) N protein +ve cells (flowcytometry). Mean +/- SEM, n=2. (D-F) Detection of viral genomic and subgenomic E RNA extracted from MDM exposed for 48 h to SARS-CoV-2-containing conditioned medium from Calu-3 cells infected in the presence or absence of (D) MAVS depletion by siRNA, (E) 10  $\mu$ M TPCA-1 or (F) 2  $\mu$ M Ruxolitinib. Mean +/- SEM n=2-4. Statistical comparison by paired two-tailed t test, n.s. : non significant. (G-K) MDM were treated with either anti-IFNAR antibody (2.5ug/ml), an isotype control IgG antibody (IgG, 2.5ug/ml), ruxolitinib (2  $\mu$ M), or mock treated during 6 h of exposure to CoM from uninfected, unmodified Calu-3 cells, before washing and measuring MDM gene expression (G, H, I), and MDM activation markers (J,K) by flowcytometry 48 h later. Both gene expression and relative MFI are compared to mock-treated MDM exposed to CoM from uninfected Calu-3s cells. Statistical testing by one-way paired ANOVA, comparing treated MDMs to untreated control by Dunnett's multiple comparison test, ns : non significant.

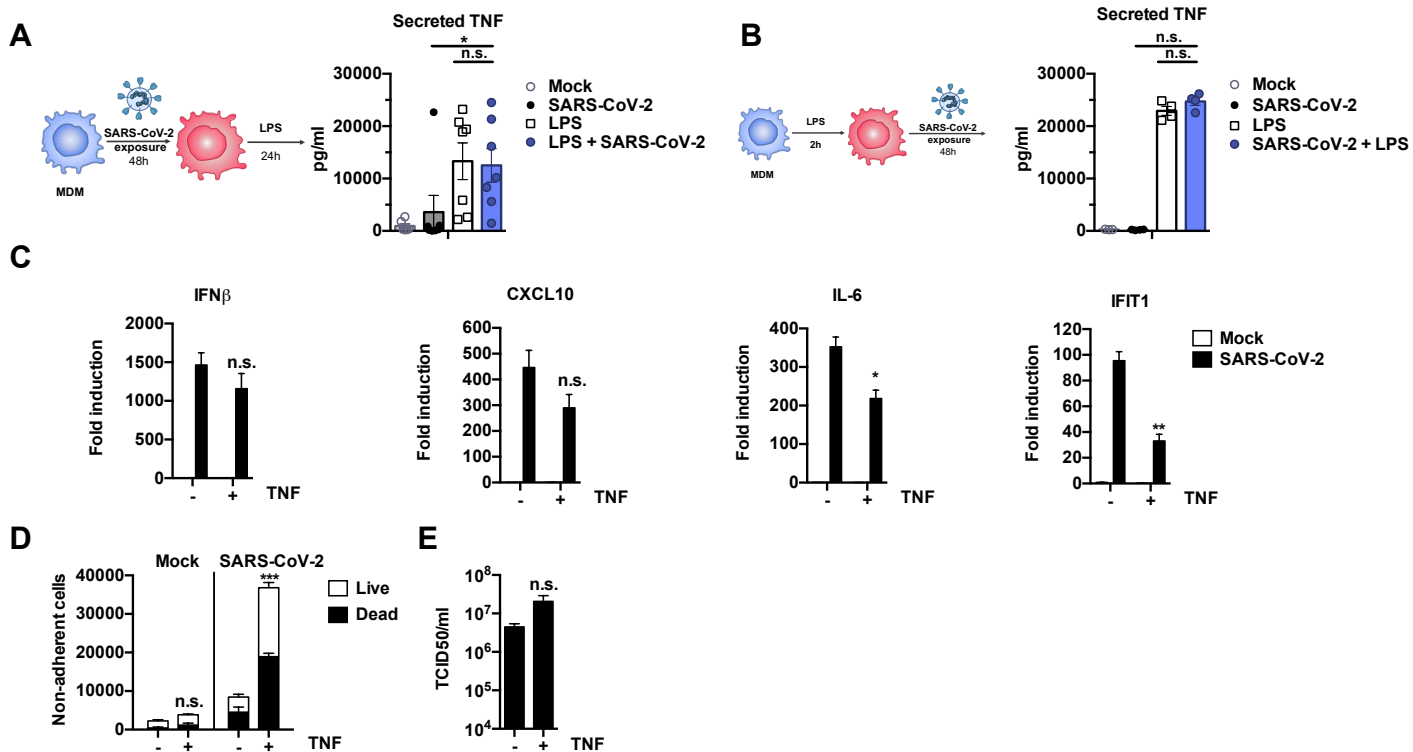

**Appendix Figure S2.** (A-B) Schematic of experimental design showing timing and order of exposure of MDM to LPS and SARS-CoV-2 (as in figure 6), and measurement of TNF (ELISA). Groups were compared as indicated by Wilcoxon matched-pairs signed rank test, \*,  $p < 0.05$ . Mean  $\pm$  SEM,  $n = 4-7$ . (C-E) SARS-CoV-2 infection of Calu-3 cells (MOI 0.04  $TCID_{50_{VERO}}/cell$ ) in the presence or absence of 10 ng/ml TNF added at the time of infection. SARS-CoV-2 infected TNF + and - groups were compared by two tailed t test. \*,  $p < 0.05$ ; \*\*,  $p < 0.01$ ; n.s., non-significant. Mean  $\pm$  SEM shown,  $n = 3$ . (C) Fold gene induction of *IFN $\beta$* , *CXCL10*, *IL-6*, and *IFIT1* at 24hpi. (D) Quantification of Live/Dead staining of non-adherent cells recovered from culture supernatants at 24hpi. (E) Virus titres in Calu-3 supernatants at 24 hpi ( $TCID_{50_{VERO}}/cell$ ).

**Appendix Table S1. Analysis parameters for detection of SARS-CoV-2 infection by intracellular nucleocapsid protein in Calu-3 cells.**

| Viral infection (Intracellular Granules Module, 10X/0.4 NA) | Analysis Parameters:                                                                                                  |
|-------------------------------------------------------------|-----------------------------------------------------------------------------------------------------------------------|
| Nucleus : Nucleus Smooth                                    | 1.9                                                                                                                   |
| Nucleus : Nucleus Background Subtraction                    | 175                                                                                                                   |
| Nucleus : Nucleus Intensity Threshold                       | 310                                                                                                                   |
| Nucleus : Nucleus Max Patch Size                            | 100                                                                                                                   |
| Nucleus : Nucleus Maximum Area                              | 800 mic.                                                                                                              |
| Nucleus : Nucleus Minimum Area                              | 32 mic.                                                                                                               |
| Cell : Cell Smooth                                          | 5                                                                                                                     |
| Cell : Cell Background Subtraction                          | 2000                                                                                                                  |
| Cell : Cell Intensity Threshold                             | 5000                                                                                                                  |
| Granules : Granules Smooth                                  | 5                                                                                                                     |
| Granules : Granules Background Subtraction                  | 45                                                                                                                    |
| Granules : Granules Intensity Threshold                     | 930                                                                                                                   |
| Granules : Granules Maximum Area                            | 1000 mic.                                                                                                             |
| Granules : Granules Max Patch Size                          | 20                                                                                                                    |
| Granules : Granules Minimum Area                            | 10 mic.                                                                                                               |
| Population: Infected: Mean Granule Intensity                | $\geq 1000$                                                                                                           |
| Output                                                      | Cell Count, Nuclear Area, Nuclear Intensity (DAPI), Cell Area (CellMask), Granule Area, Granule Intensity (N-Protein) |

**Appendix Table S2. Analysis parameters for IRF3/NFkB nuclear intensity during SARS-CoV-2 infection in Calu-3 cells.**

| <b>IRF3/NFkB Nuclear Intensity (Intranuclear Foci Module, 40X/0.75NA)</b> | <b>Analysis Parameters:</b>                                                                                                                |
|---------------------------------------------------------------------------|--------------------------------------------------------------------------------------------------------------------------------------------|
| Nucleus : Nucleus Smooth                                                  | 1                                                                                                                                          |
| Nucleus : Nucleus Background Subtraction                                  | 109.8                                                                                                                                      |
| Nucleus : Nucleus Intensity Threshold                                     | 150                                                                                                                                        |
| Nucleus : Nucleus Maximum Merge Area                                      | 60                                                                                                                                         |
| Nucleus : Nucleus Minimum Area                                            | 30                                                                                                                                         |
| Nucleus : Nucleus Maximum Area                                            | 900                                                                                                                                        |
| Foci : Foci Smooth                                                        | 1                                                                                                                                          |
| Foci : Foci Background Subtraction                                        | 105                                                                                                                                        |
| Foci : Foci Intensity Threshold                                           | 2170                                                                                                                                       |
| Foci : Foci Maximum Merge Area                                            | 105 mic.                                                                                                                                   |
| Foci : Foci Minimum Area                                                  | 30 mic.                                                                                                                                    |
| Foci : Foci Maximum Area                                                  | 2000 mic.                                                                                                                                  |
| Output:                                                                   | Cell Count, Nuclear Area, Nuclear Intensity (DAPI), Nuclear Intensity of Marker Protein (IRF3/NFkB), Foci Area, Foci Intensity (N-Protein) |

**Appendix Table S3. Analysis parameters for RNA FISH detection during SARS-CoV-2 infection in Calu-3 cells.**

| <b>RNA FISH analysis (Mitochondria Module, 40X/0.75 NA)</b> | <b>Analysis Parameters:</b>                                                                                                                                               |
|-------------------------------------------------------------|---------------------------------------------------------------------------------------------------------------------------------------------------------------------------|
| Nucleus : Smooth                                            | 1.2                                                                                                                                                                       |
| Nucleus : Background Subtraction                            | 68                                                                                                                                                                        |
| Nucleus : Intensity Threshold                               | 220                                                                                                                                                                       |
| Nucleus : Maximal area for merging                          | 30                                                                                                                                                                        |
| Nucleus : Minimum Area                                      | 57 mic.                                                                                                                                                                   |
| Nucleus : Maximum Area                                      | 800 mic.                                                                                                                                                                  |
| Cell : Smooth                                               | 2                                                                                                                                                                         |
| Cell : Intensity Threshold                                  | 2500                                                                                                                                                                      |
| Mitochondria : Background Subtraction                       | 108.8                                                                                                                                                                     |
| Mitochondria : Minimum Length                               | 1                                                                                                                                                                         |
| Mitochondria : Typical Width                                | 1                                                                                                                                                                         |
| Mitochondria : Intensity Threshold                          | 2000                                                                                                                                                                      |
| Mitochondria : Maximal area for merging                     | 1                                                                                                                                                                         |
| Mitochondria : Minimum Area                                 | 1 mic.                                                                                                                                                                    |
| Mitochondria : Maximum Area                                 | 121 mic.                                                                                                                                                                  |
| Output:                                                     | Cell Count, Nuclear Area, Nuclear Intensity (DAPI), Cell Area (CellMask), Cellular Intensity of Marker Protein(IL6/IFIT1/GAPDH), Mitochondria Area/ Intensity (N-Protein) |

**Appendix Table S4. Total population cell numbers imaged for each condition.**

| <b>SARS-CoV-2 infection<br/>(10X)</b>   | <b>Total population (hours post infection)</b> |             |              |              |              |              |
|-----------------------------------------|------------------------------------------------|-------------|--------------|--------------|--------------|--------------|
|                                         | <b>2hpi</b>                                    | <b>6hpi</b> | <b>10hpi</b> | <b>24hpi</b> | <b>48hpi</b> | <b>72hpi</b> |
| Mock                                    | 19884                                          | 23937       | 22564        | 29058        | 36589        | 40971        |
| MOI0.04                                 | 16877                                          | 21856       | 21103        | 23128        | 10954        | 6811         |
| MOI0.4                                  | 18171                                          | 21811       | 21671        | 24401        | 14784        | 8751         |
| MOI2                                    | 16507                                          | 22215       | 21397        | 22324        | 12199        | 6584         |
| <b>Nuclear accumulation: NFkB (40X)</b> |                                                |             |              |              |              |              |
| Mock                                    | 4208                                           | 4732        | 2561         | 5811         | 6547         | 7404         |
| MOI0.0004                               | 1308                                           | 1322        | 1477         | 1250         | 949          | 1120         |
| MOI0.004                                | 1490                                           | 1481        | 1583         | 1461         | 1073         | 643          |
| MOI0.04                                 | 3580                                           | 4445        | 4044         | 4594         | 2565         | 1706         |
| MOI0.4                                  | 4136                                           | 4521        | 4245         | 4425         | 2533         | 2102         |
| MOI2                                    | 2186                                           | 3402        | 2785         | 3360         | 2393         | 1309         |
| <b>Nuclear accumulation: IRF3 (40X)</b> |                                                |             |              |              |              |              |
| Mock                                    | 3718                                           | 4347        | 3607         | 4602         | 6205         | 8140         |
| MOI0.0004                               | 1512                                           | 1110        | 1363         | 1156         | 1285         | 1029         |
| MOI0.004                                | 1290                                           | 1250        | 1310         | 1489         | 797          | 445          |
| MOI0.04                                 | 4125                                           | 4389        | 4515         | 4910         | 2465         | 2140         |
| MOI0.4                                  | 4602                                           | 3966        | 4782         | 4148         | 2572         | 1728         |
| MOI2                                    | 2417                                           | 3287        | 3213         | 2834         | 2035         | 1620         |
| <b>RNA-FISH IL-6 (40X)</b>              |                                                |             |              |              |              |              |
| MOI 0.4                                 | -                                              | 3677        | 4331         | 4203         | -            | -            |
| <b>RNA-FISH GAPDH (40X)</b>             |                                                |             |              |              |              |              |
| MOI 0.4                                 | -                                              | 3876        | 3620         | 4276         | -            | -            |

**Appendix Table S5. Numbers of N positive cells imaged for NFkB and IRF3 nuclear translocation in each condition.**

|                                         | <b>Nuclear accumulation: NFkB (40X)</b> |             |              |              |              |              |
|-----------------------------------------|-----------------------------------------|-------------|--------------|--------------|--------------|--------------|
|                                         | <b>N+ cells</b>                         |             |              |              |              |              |
|                                         | <b>2hpi</b>                             | <b>6hpi</b> | <b>10hpi</b> | <b>24hpi</b> | <b>48hpi</b> | <b>72hpi</b> |
| MOI0.0004                               | 0                                       | 0           | 0            | 0            | 356          | 276          |
| MOI0.004                                | 0                                       | 0           | 4            | 56           | 116          | 19           |
| MOI0.04                                 | 0                                       | 18          | 71           | 1875         | 1309         | 643          |
| MOI0.4                                  | 0                                       | 37          | 358          | 1874         | 1423         | 791          |
| MOI2                                    | 0                                       | 146         | 446          | 2048         | 1373         | 509          |
| <b>Nuclear accumulation: IRF3 (40X)</b> |                                         |             |              |              |              |              |
| MOI0.0004                               | 0                                       | 0           | 0            | 0            | 301          | 67           |
| MOI0.004                                | 0                                       | 0           | 0            | 86           | 159          | 27           |
| MOI0.04                                 | 0                                       | 18          | 71           | 1875         | 1309         | 643          |
| MOI0.4                                  | 0                                       | 34          | 360          | 2096         | 1323         | 607          |
| MOI2                                    | 0                                       | 123         | 557          | 1669         | 1162         | 592          |
| <b>Nuclear accumulation: NFkB (40X)</b> |                                         |             |              |              |              |              |
|                                         | <b>Total cells</b>                      |             |              |              |              |              |
| MOI0.0004                               | 1308                                    | 1322        | 1477         | 1250         | 949          | 1120         |
| MOI0.004                                | 1490                                    | 1481        | 1583         | 1461         | 1073         | 643          |
| MOI0.04                                 | 3580                                    | 4445        | 4044         | 4594         | 2565         | 1706         |
| MOI0.4                                  | 4136                                    | 4521        | 4245         | 4425         | 2533         | 2102         |
| MOI2                                    | 2186                                    | 3402        | 2785         | 3360         | 2393         | 1309         |
| <b>Nuclear accumulation: IRF3 (40X)</b> |                                         |             |              |              |              |              |
| MOI0.0004                               | 1512                                    | 1110        | 1363         | 1156         | 1285         | 1029         |
| MOI0.004                                | 1290                                    | 1250        | 1310         | 1489         | 797          | 445          |
| MOI0.04                                 | 4125                                    | 4389        | 4515         | 4910         | 2465         | 2140         |
| MOI0.4                                  | 4602                                    | 3966        | 4782         | 4148         | 2572         | 1728         |
| MOI2                                    | 2417                                    | 3287        | 3213         | 2834         | 2035         | 1620         |

**Appendix Table S6. Numbers of N negative cells imaged for NFkB and IRF3 nuclear translocation in each condition.**

|                                         | <b>Nuclear accumulation: NFkB (40X)</b> |             |              |              |              |              | <b>N-ve cells</b> |  |
|-----------------------------------------|-----------------------------------------|-------------|--------------|--------------|--------------|--------------|-------------------|--|
|                                         | <b>2hpi</b>                             | <b>6hpi</b> | <b>10hpi</b> | <b>24hpi</b> | <b>48hpi</b> | <b>72hpi</b> |                   |  |
| MOI0.0004                               | 1308                                    | 1322        | 1477         | 1250         | 593          | 844          |                   |  |
| MOI0.004                                | 1490                                    | 1481        | 1579         | 1405         | 957          | 624          |                   |  |
| MOI0.04                                 | 3580                                    | 4427        | 3973         | 2719         | 1256         | 1063         |                   |  |
| MOI0.4                                  | 4136                                    | 4484        | 3887         | 2551         | 1110         | 1311         |                   |  |
| MOI2                                    | 2186                                    | 3256        | 2339         | 1312         | 1020         | 800          |                   |  |
| <b>Nuclear accumulation: IRF3 (40X)</b> |                                         |             |              |              |              |              |                   |  |
| MOI0.0004                               | 1512                                    | 1110        | 1363         | 1156         | 984          | 962          |                   |  |
| MOI0.004                                | 1290                                    | 1250        | 1310         | 1403         | 638          | 418          |                   |  |
| MOI0.04                                 | 4125                                    | 4371        | 4444         | 3035         | 1156         | 1497         |                   |  |
| MOI0.4                                  | 4602                                    | 3932        | 4422         | 2052         | 1249         | 1121         |                   |  |
| MOI2                                    | 2417                                    | 3164        | 2656         | 1165         | 873          | 1028         |                   |  |

**Appendix Table S7. Numbers of N negative cells imaged for NFkB and IRF3 nuclear translocation in each condition.**

| <b>Nuclear accumulation: NFkB (40X)</b> | <b>2hpi</b> | <b>6hpi</b> | <b>10hpi</b> | <b>24hpi</b> | <b>48hpi</b> | <b>72hpi</b> |
|-----------------------------------------|-------------|-------------|--------------|--------------|--------------|--------------|
| Mock rep1                               | 2981        | 3532        | 1499         | 4410         | 4866         | 5843         |
| Mock rep2                               | 1227        | 1200        | 1062         | 1401         | 1681         | 1561         |
| Total                                   | 4208        | 4732        | 2561         | 5811         | 6547         | 7404         |
| <b>Nuclear accumulation: IRF3 (40X)</b> | <b>2hpi</b> | <b>6hpi</b> | <b>10hpi</b> | <b>24hpi</b> | <b>48hpi</b> | <b>72hpi</b> |
| Mock rep1                               | 2675        | 3139        | 2522         | 3288         | 4647         | 6011         |
| Mock rep2                               | 1043        | 1208        | 1085         | 1314         | 1558         | 2129         |
| Total                                   | 3718        | 4347        | 3607         | 4602         | 6205         | 8140         |
